# Supplementary material for: Enantioselective pharmacokinetics of tramadol and its three main metabolites; impact of CYP2D6, CYP2B6, and CYP3A4 genotype
Source: PubMed Central journal article supplement (PMC6034060; doi:10.1002/prp2.419), 2018-07-05

# Supplementary Data

---

The diagrams show the correlation between the enantiomer ratios of tramadol, *O*-desmethyltramadol (ODT), *N*-desmethyltramadol (NDT) and *N,O*-didesmethyltramadol (NODT) and time following drug administration on an individual basis.

ENANTIOSELECTIVE PHARMACOKINETICS OF TRAMADOL AND ITS THREE MAIN METABOLITES; IMPACT OF *CYP2D6*, *CYP2B6* AND *CYP3A4* GENOTYPE

Haage et al.

Pharmacology Research & Perspectives

Subject 17

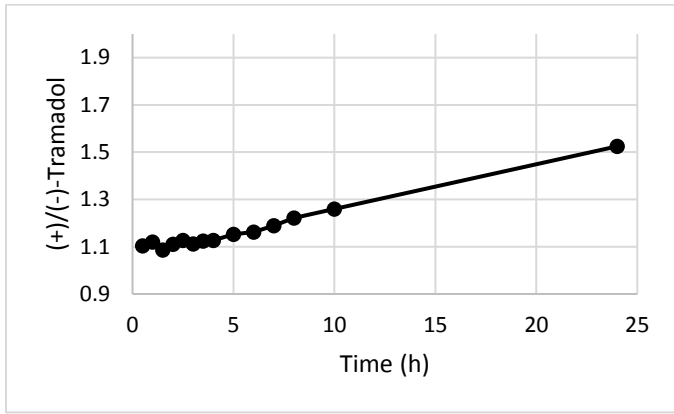

Subject 09

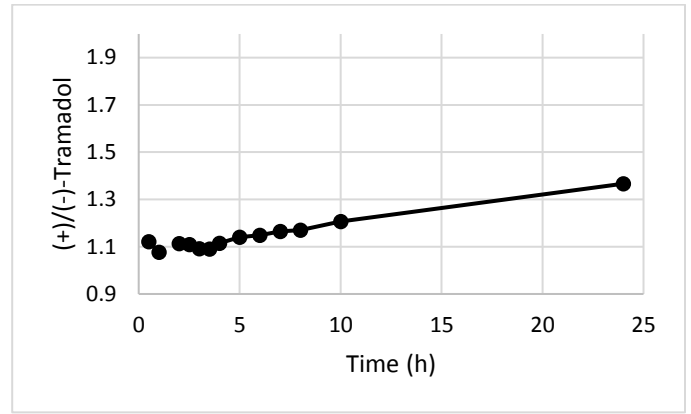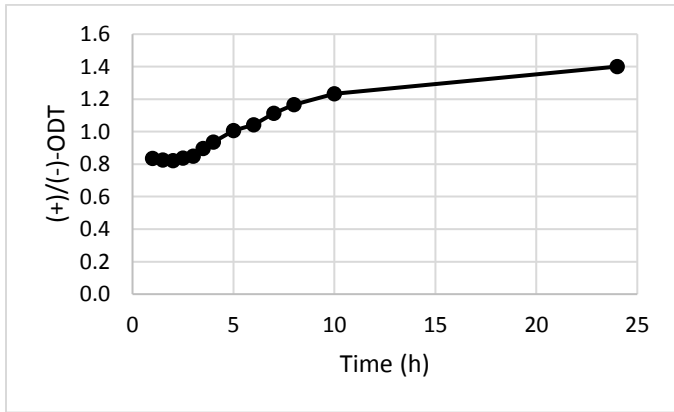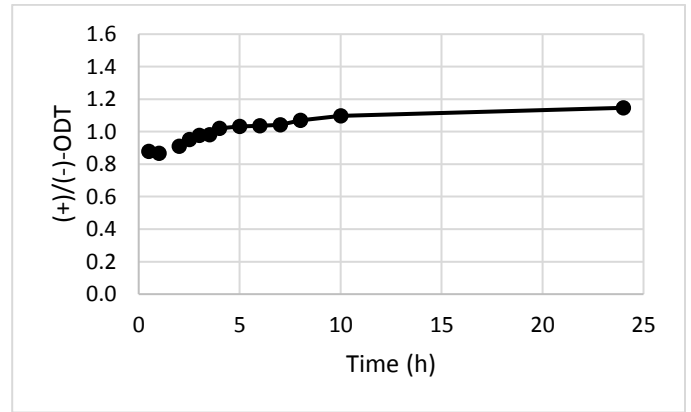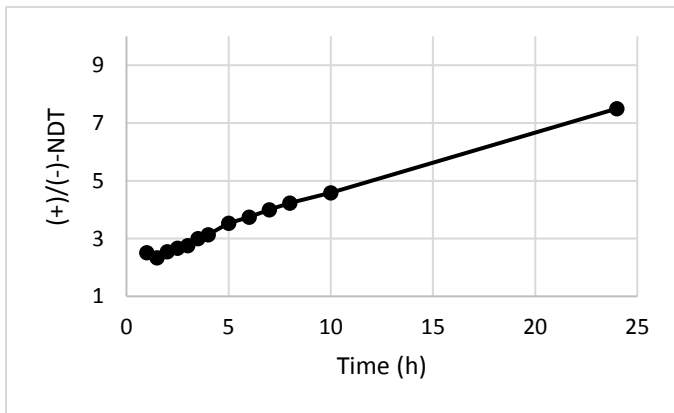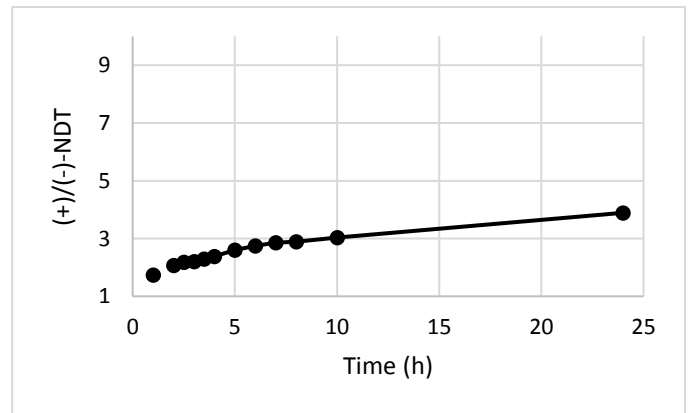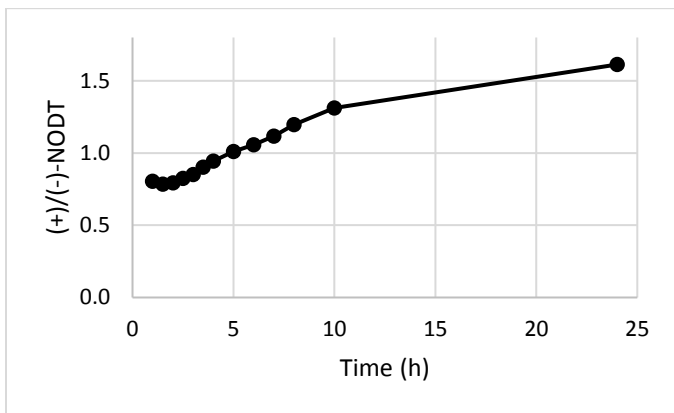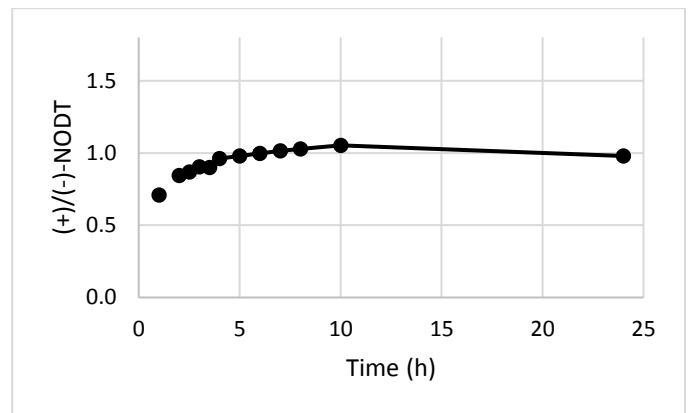

Subject 08

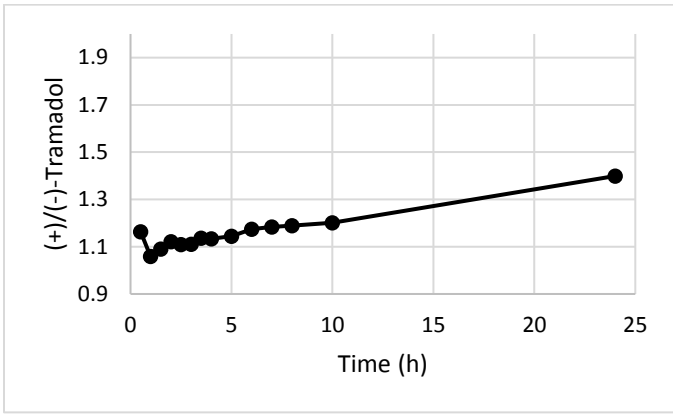

Subject 18

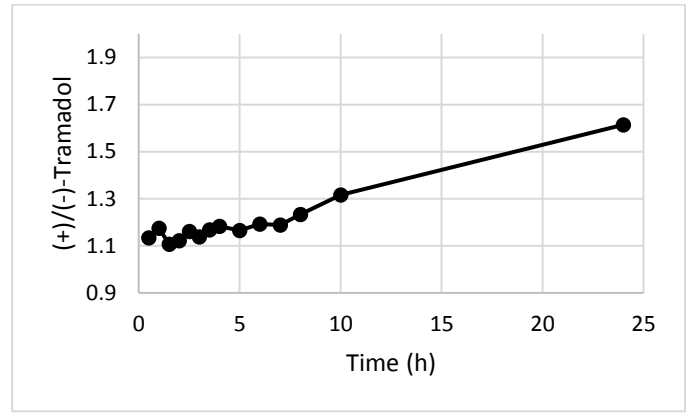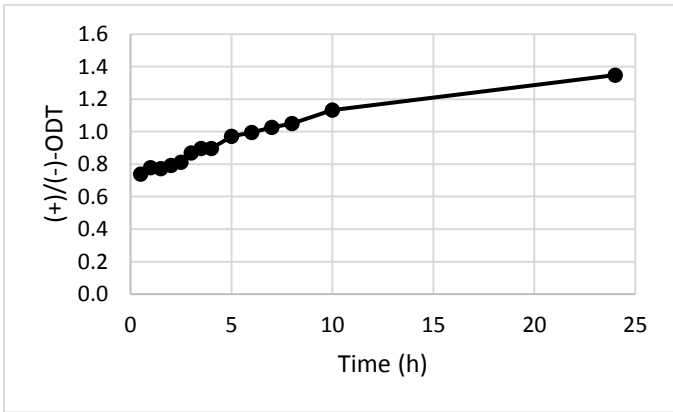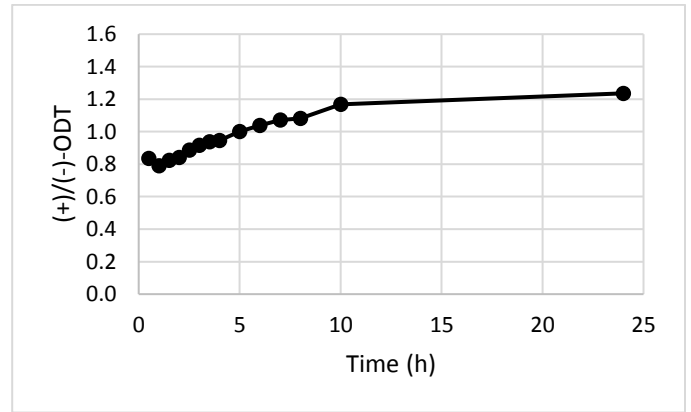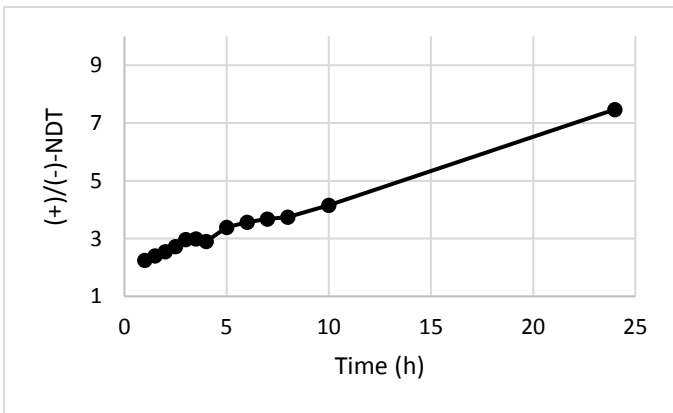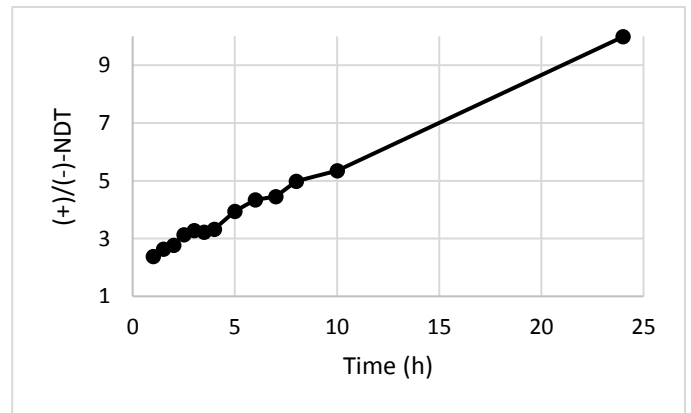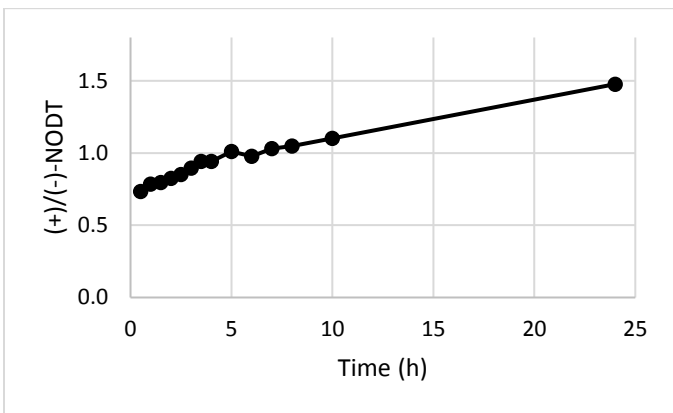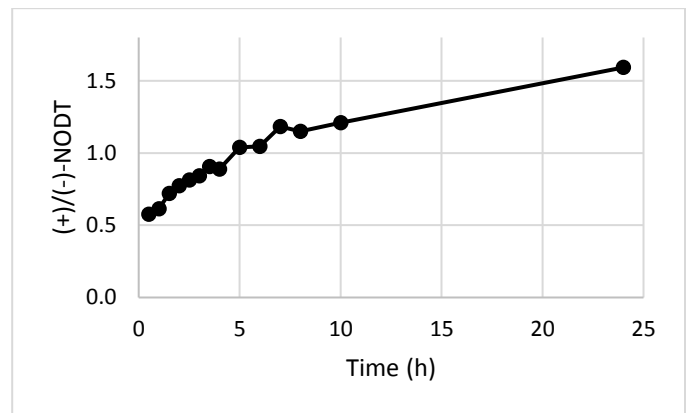

Subject 01

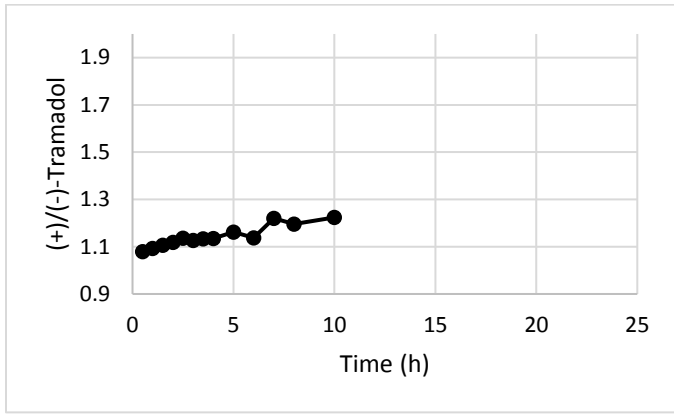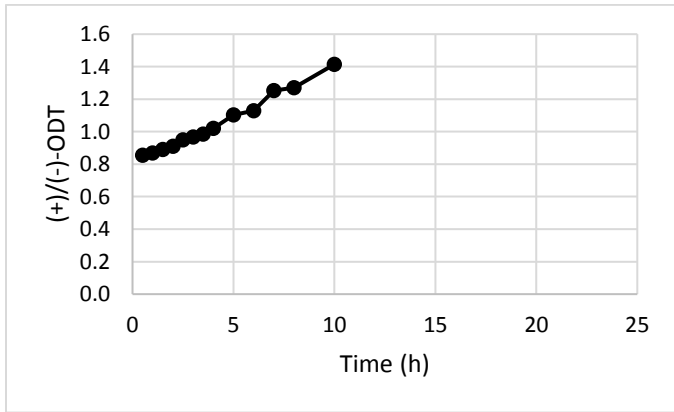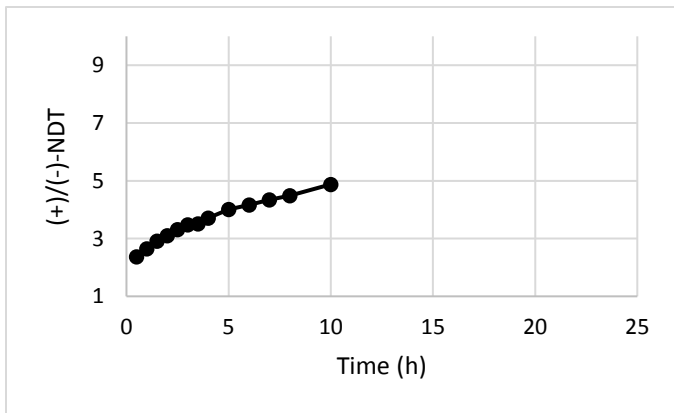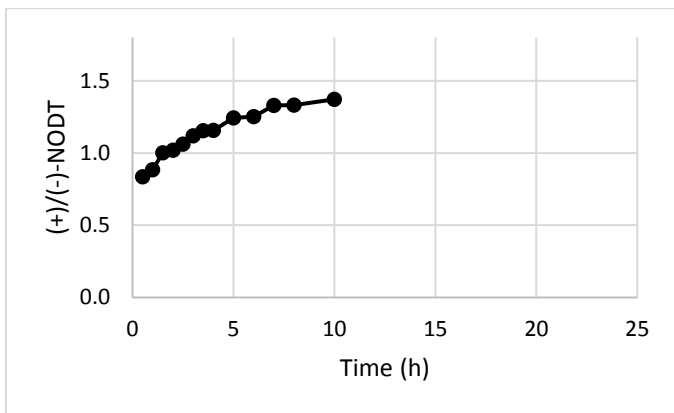

Subject 10

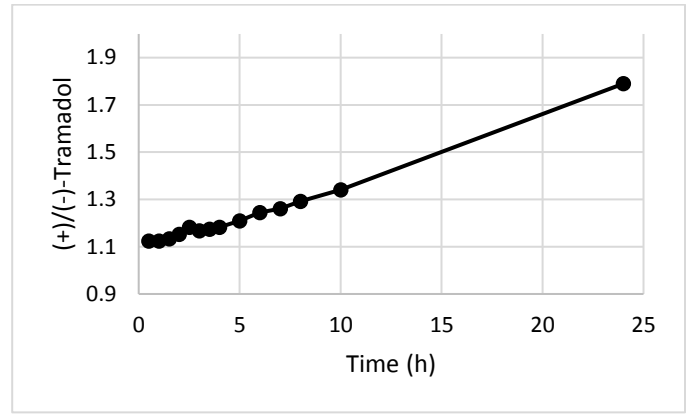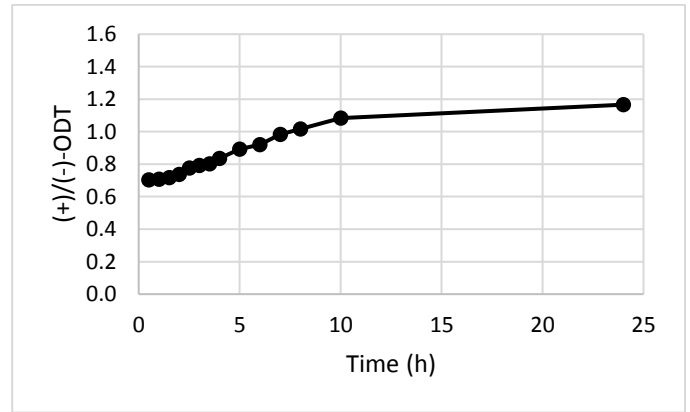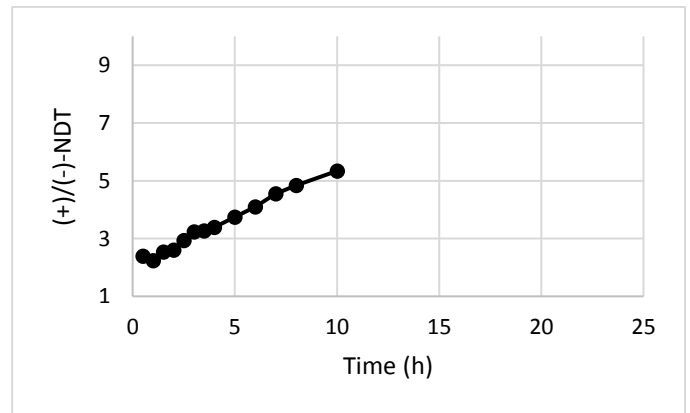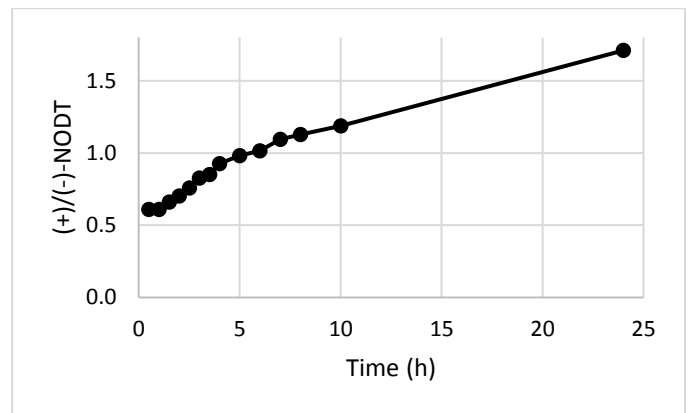

Subject 14

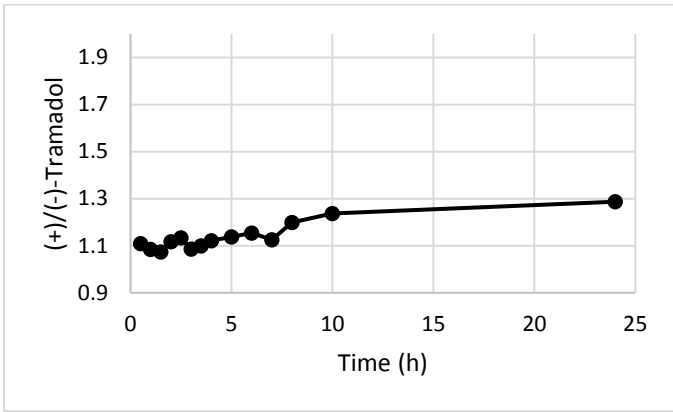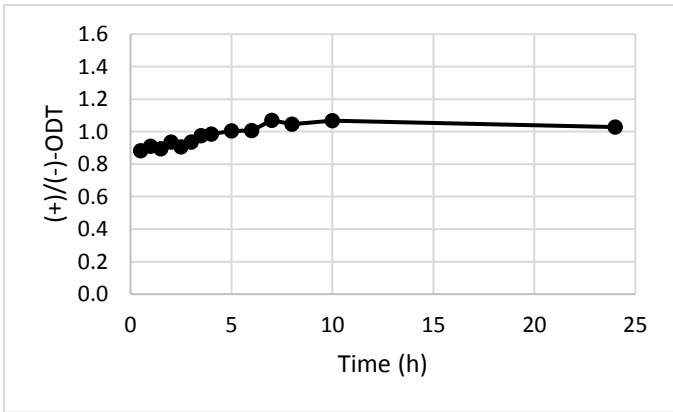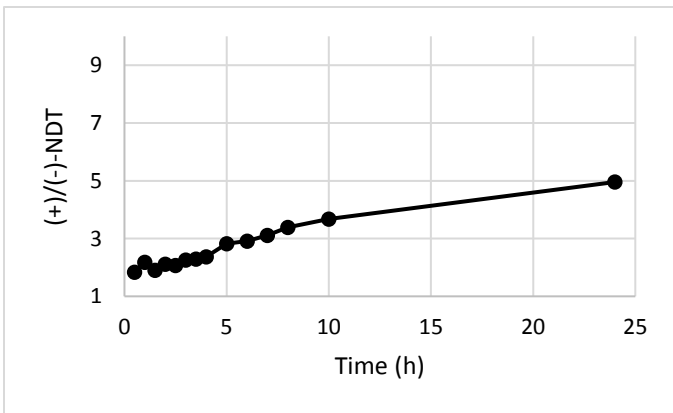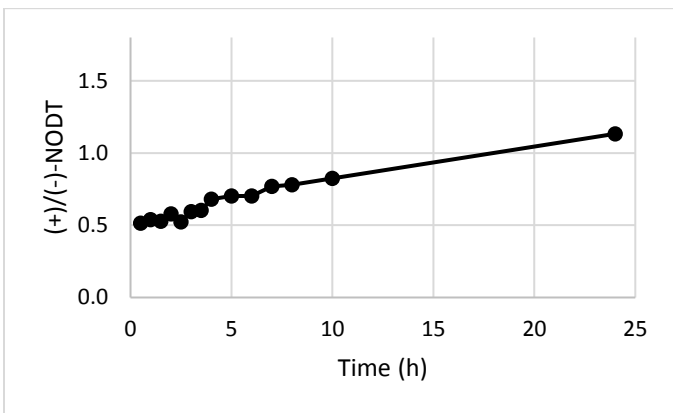

Subject 02

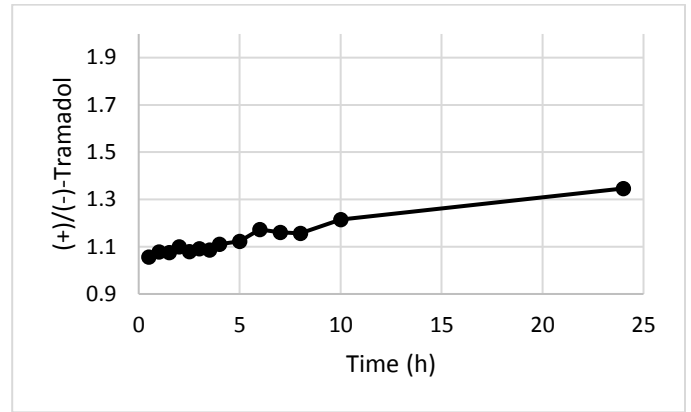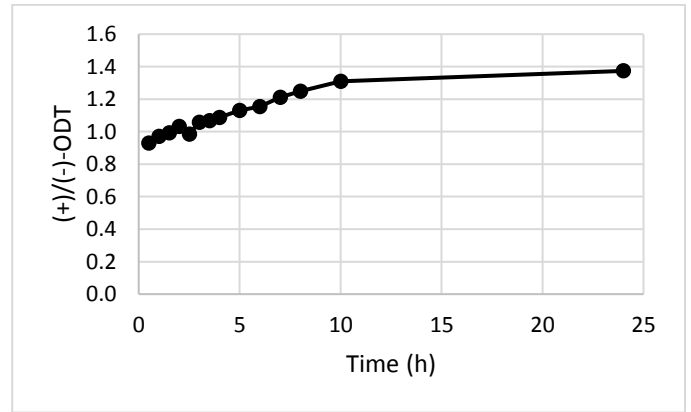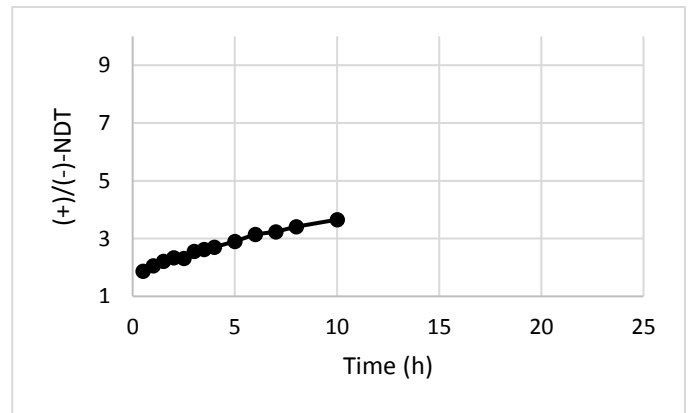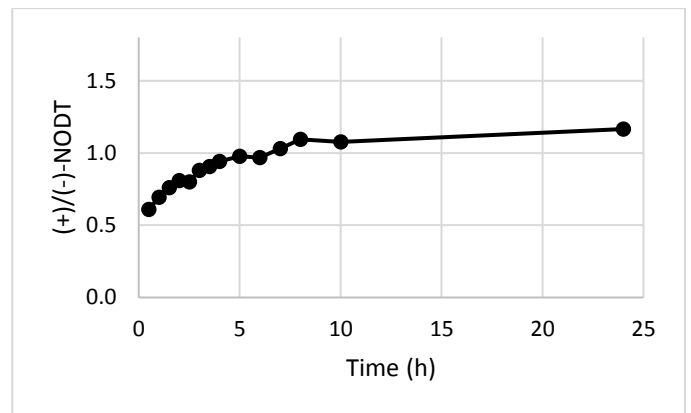

Subject 11

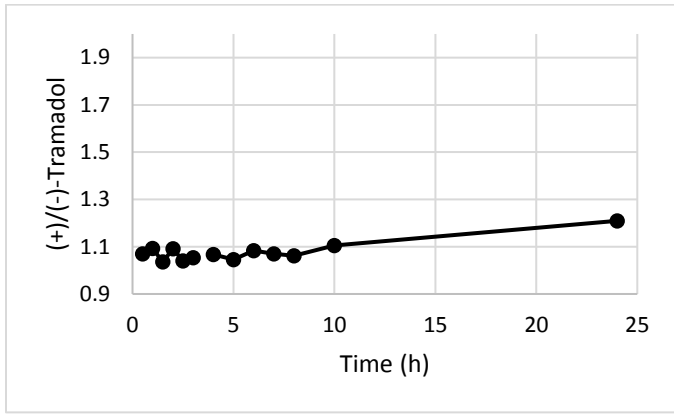

Subject 15

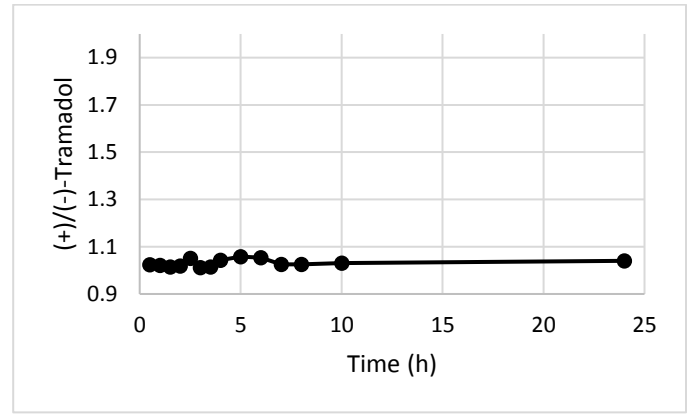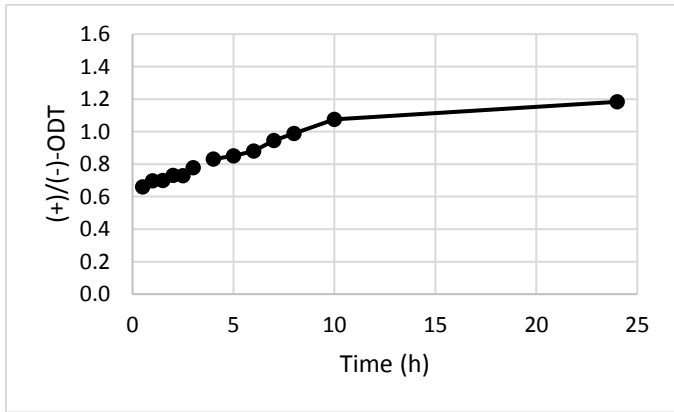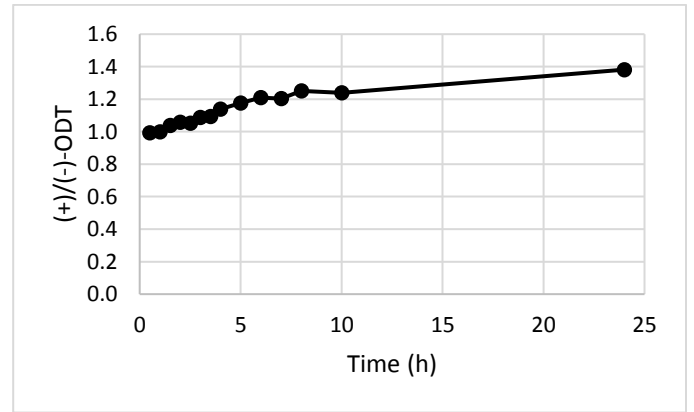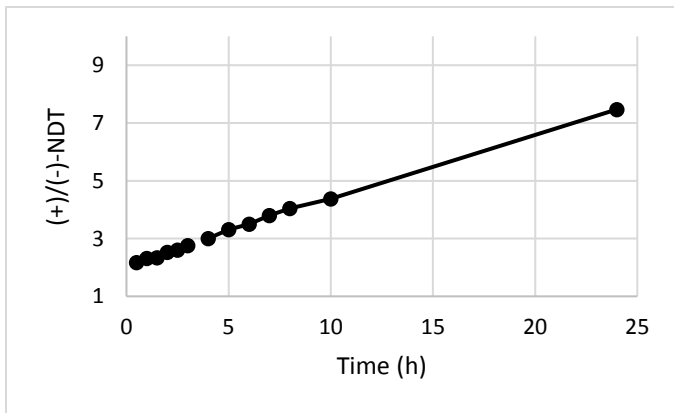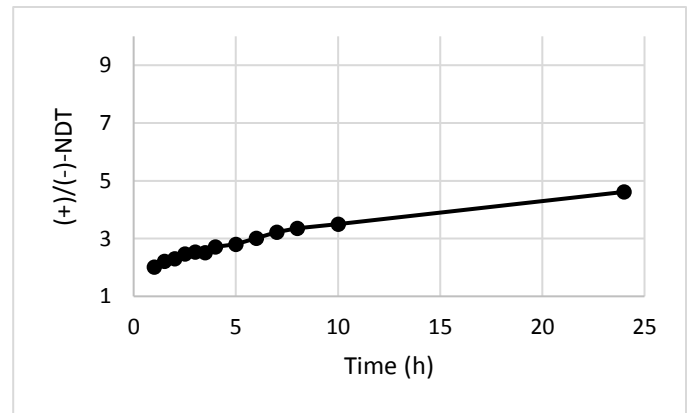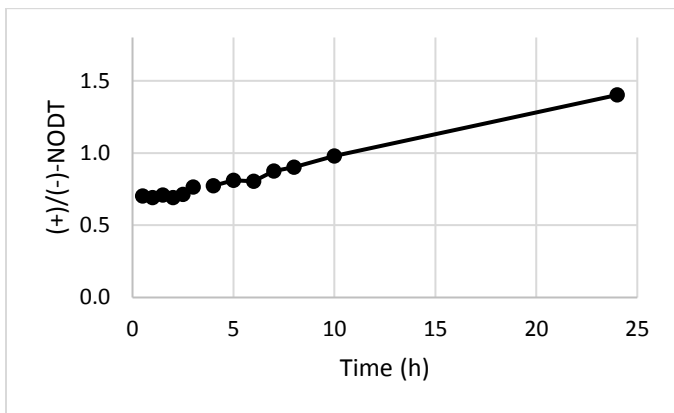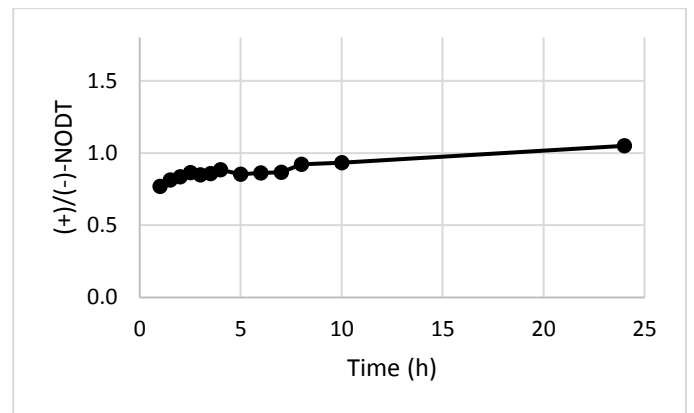

Subject 12

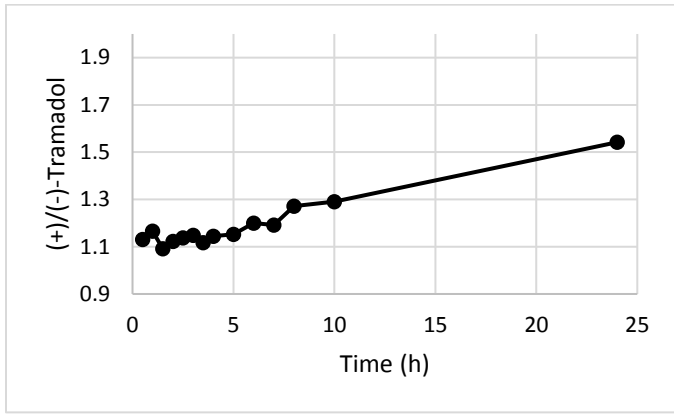

Subject 03

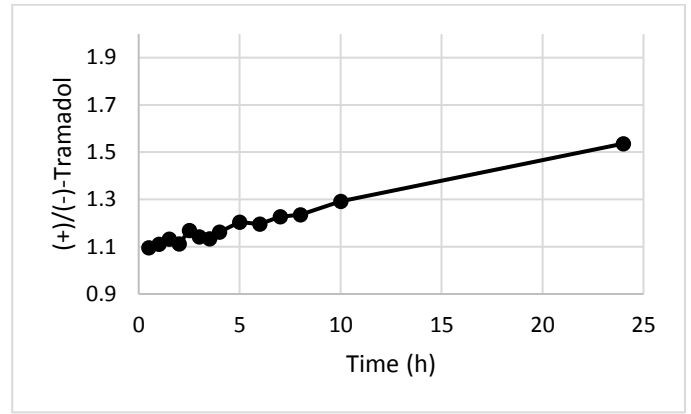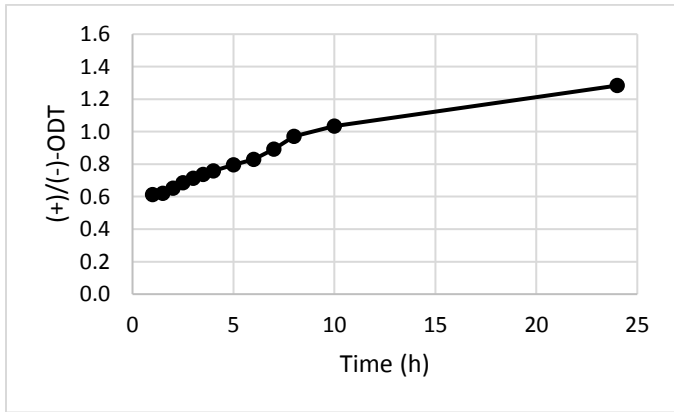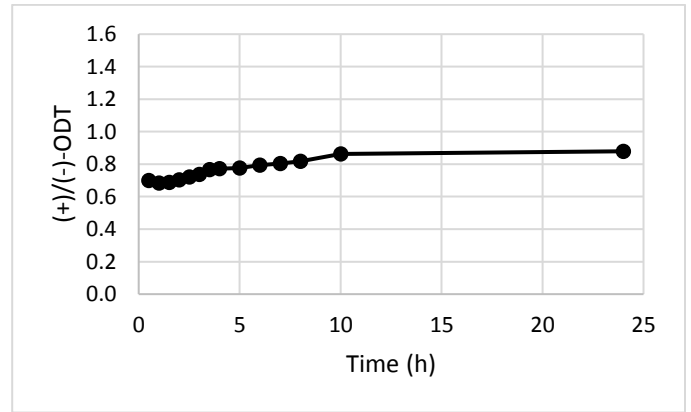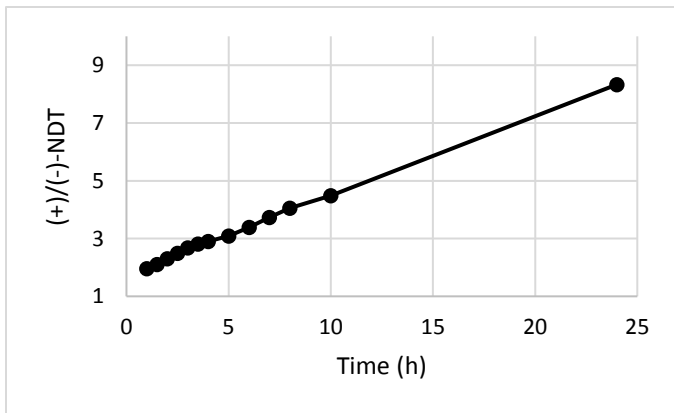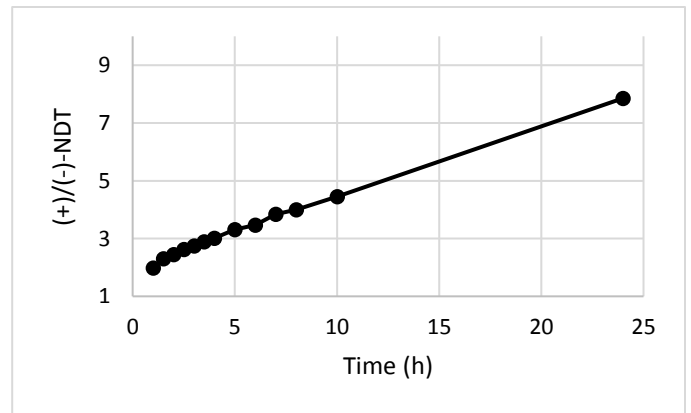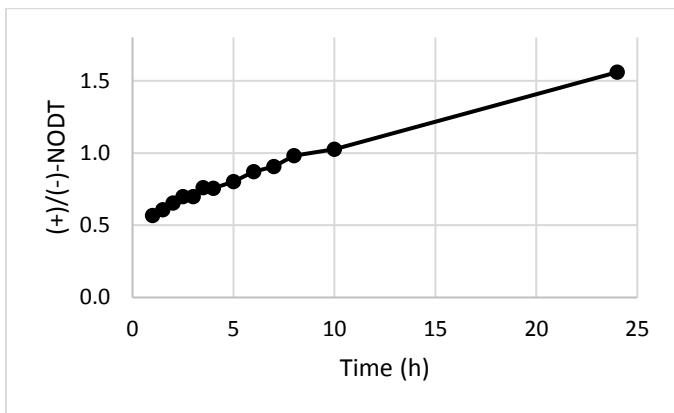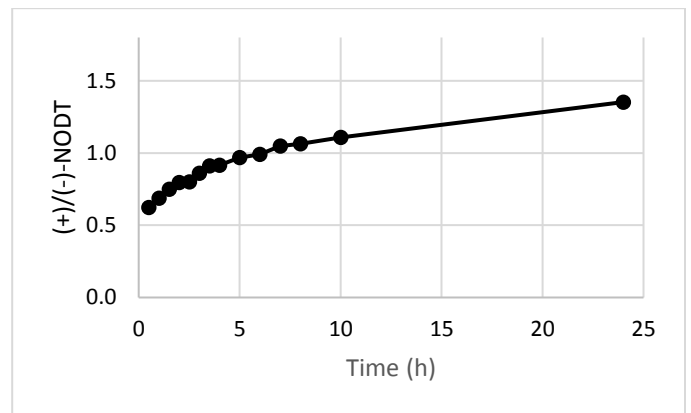

Subject 07

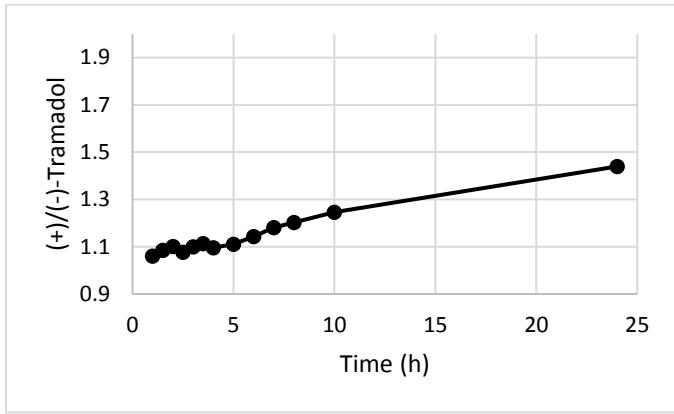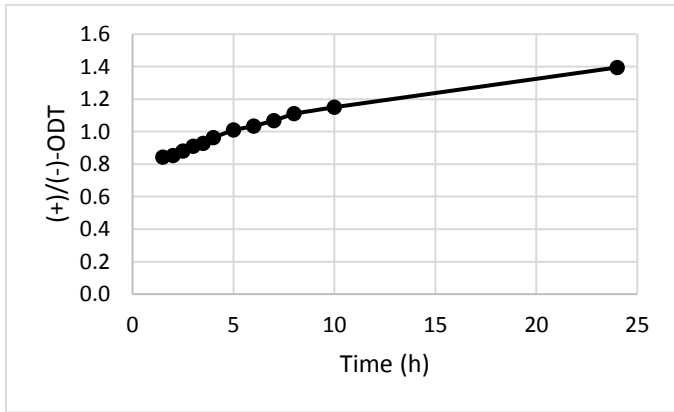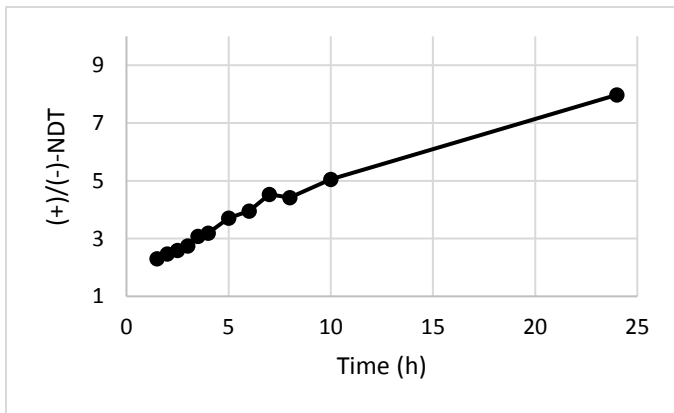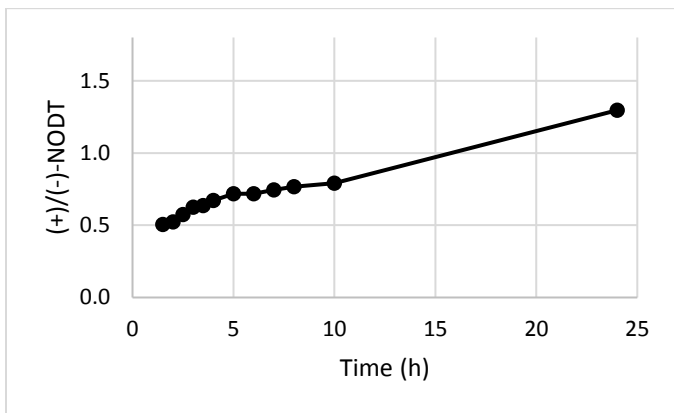

Subject 13

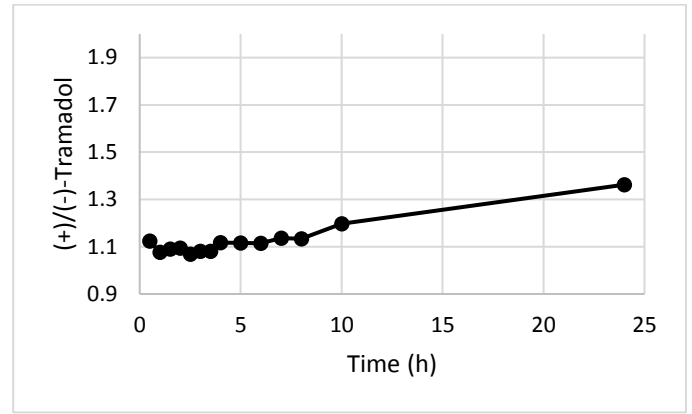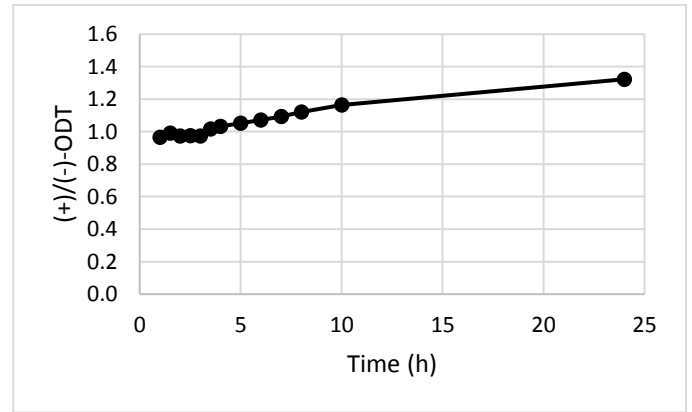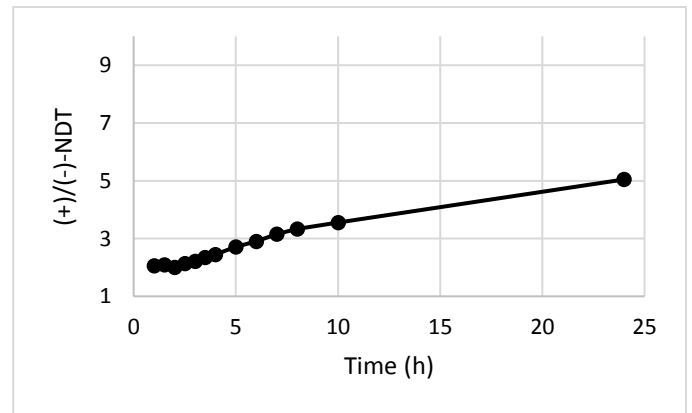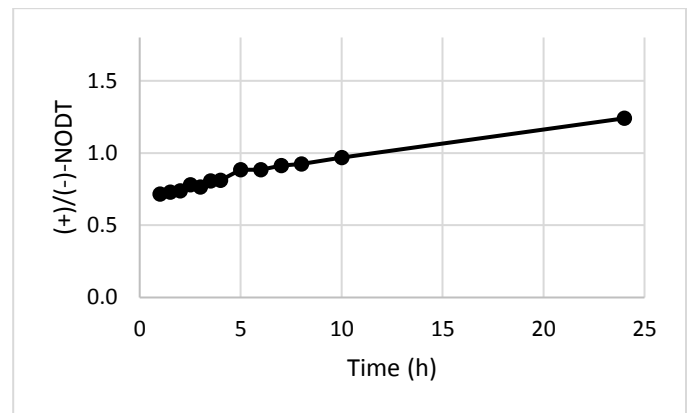



Subject 16

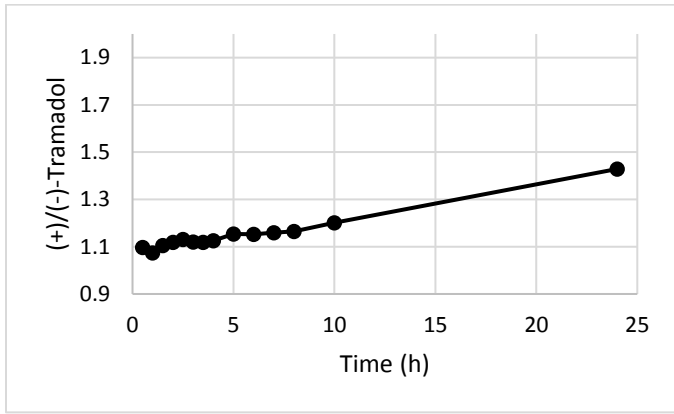

Subject 04

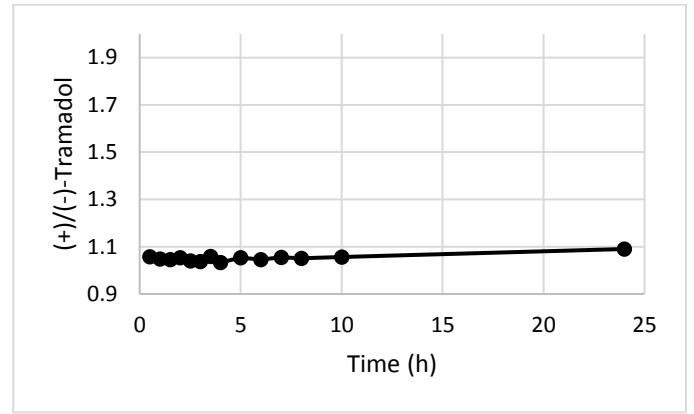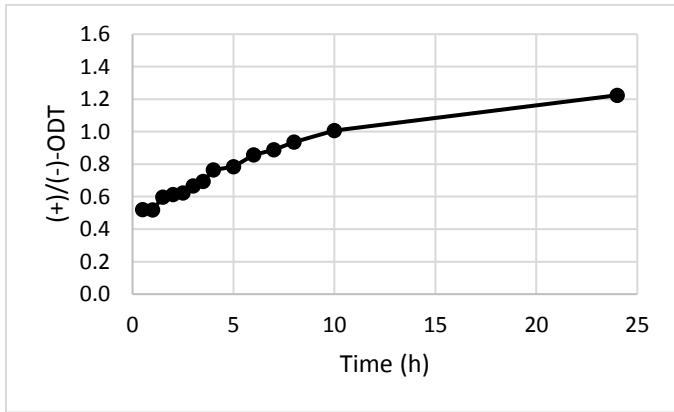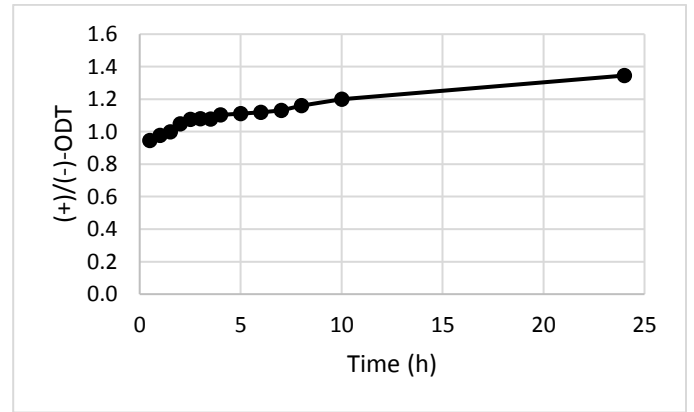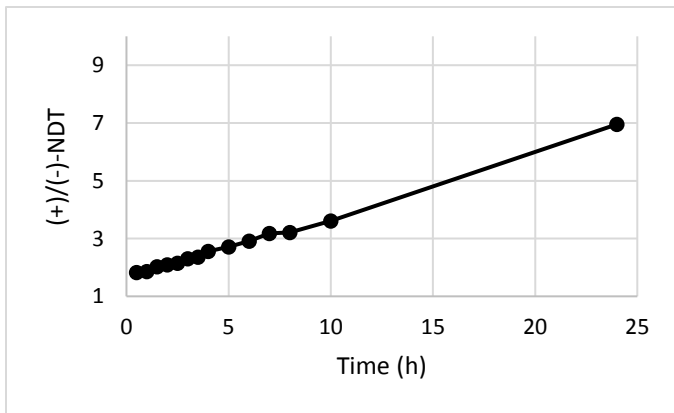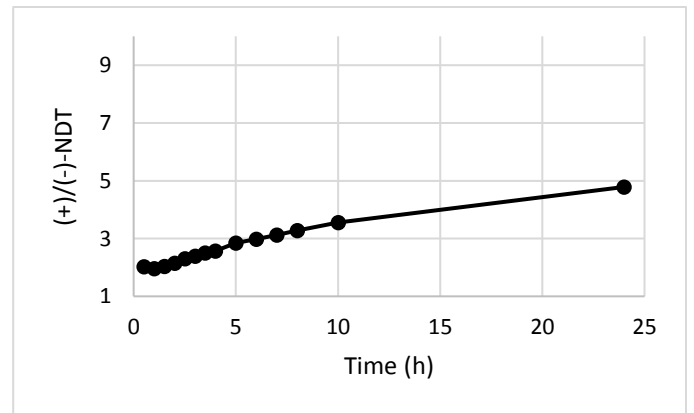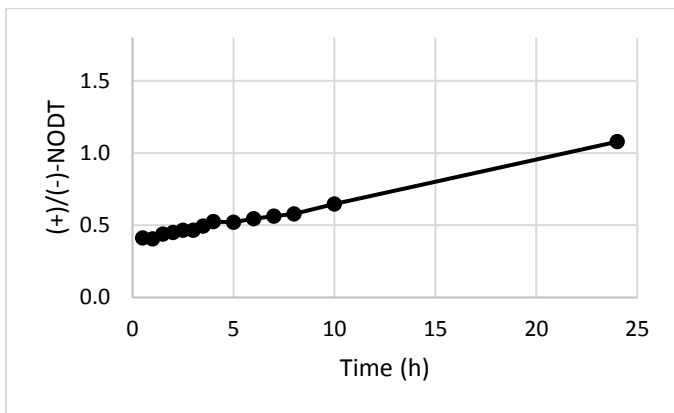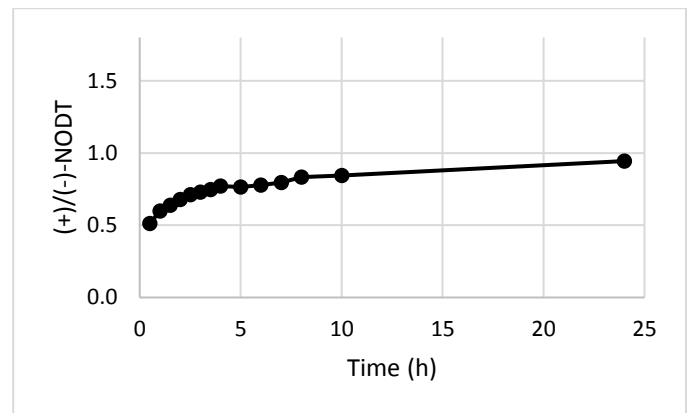

Subject 06

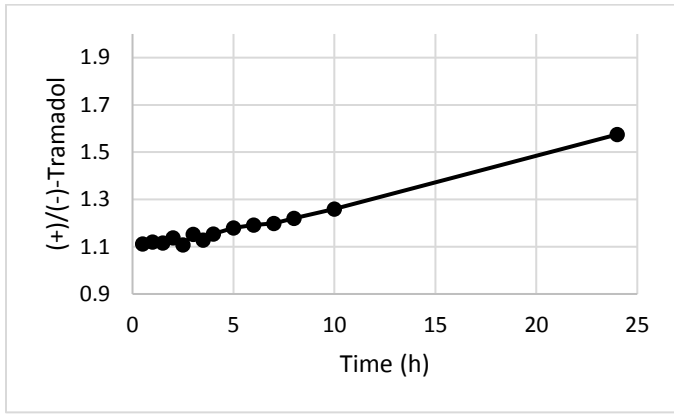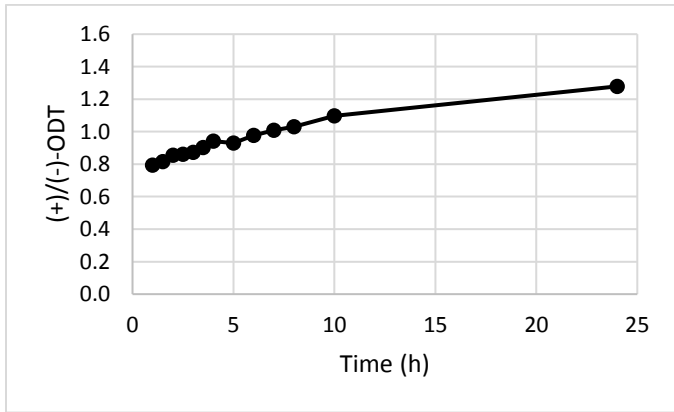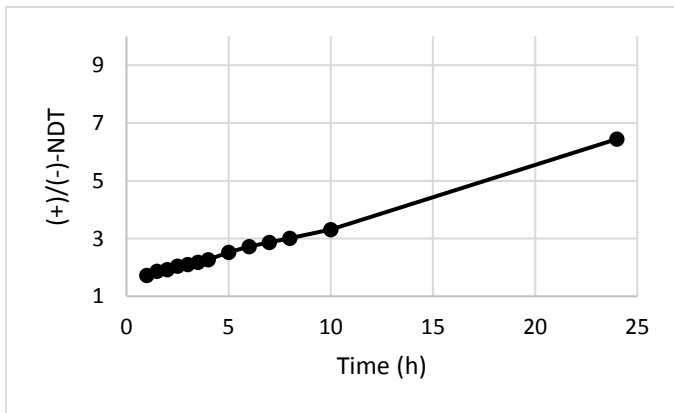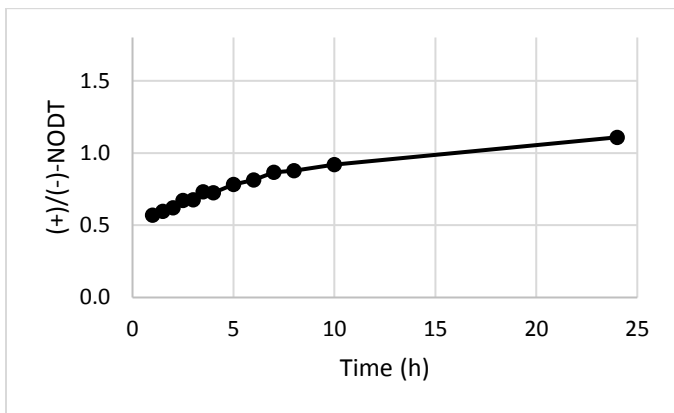

Subject 19

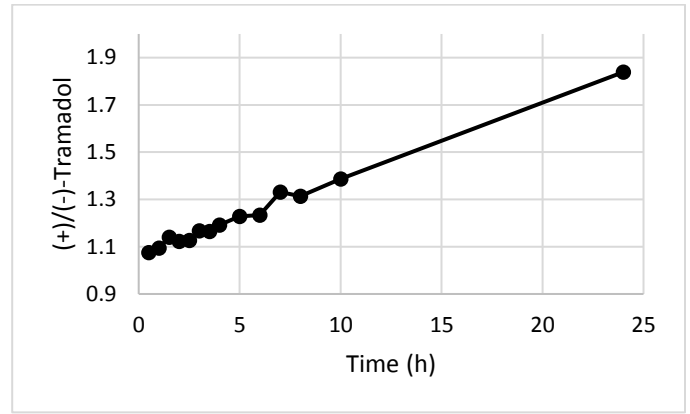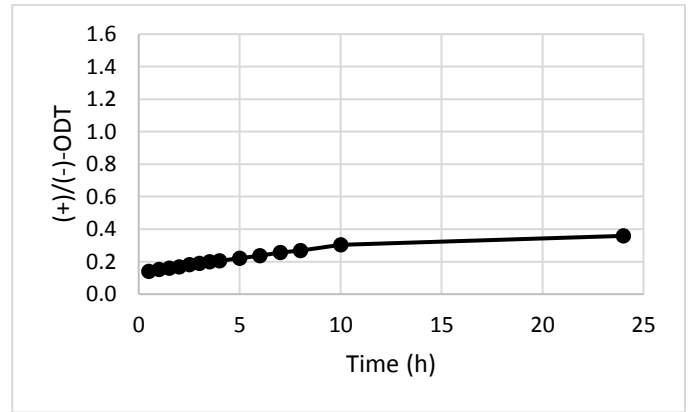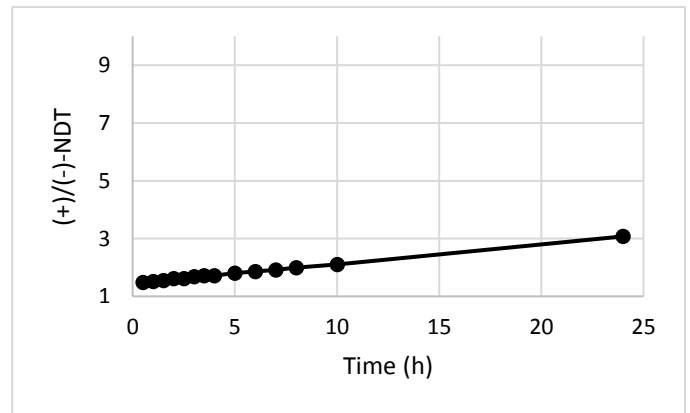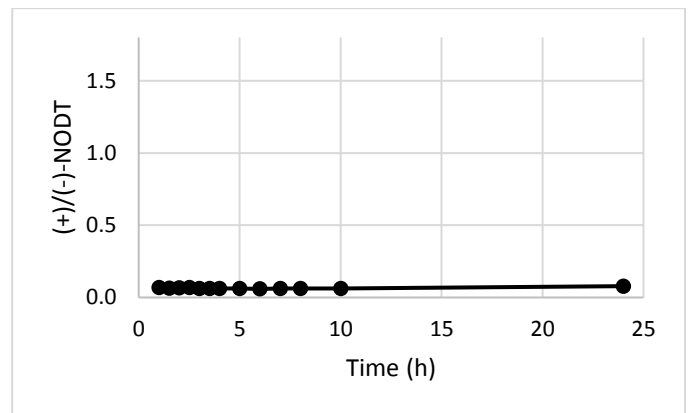

# Subject 05

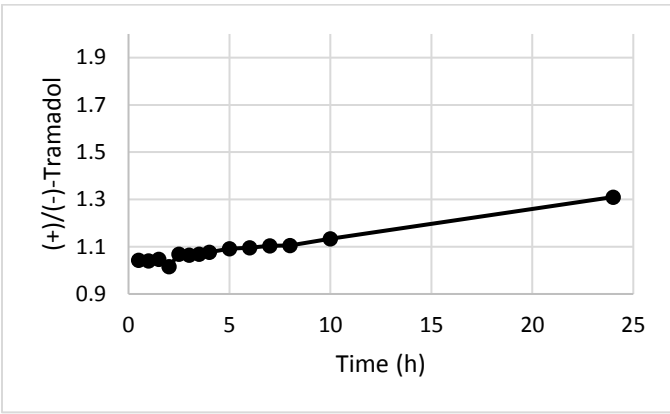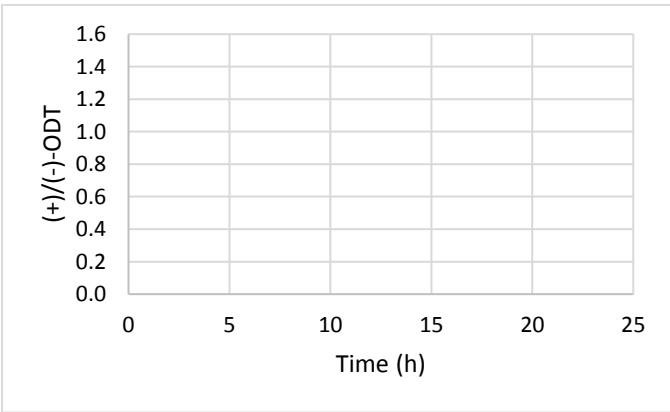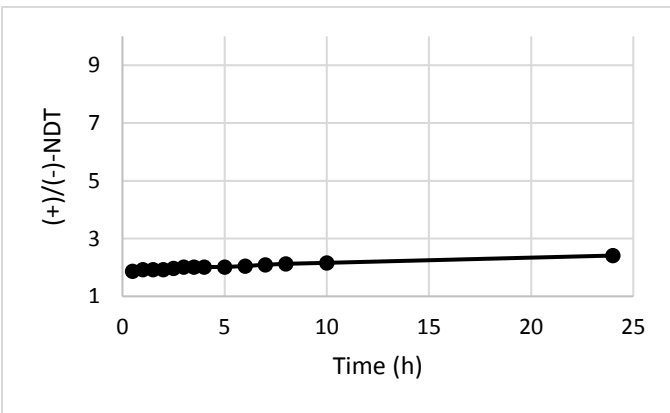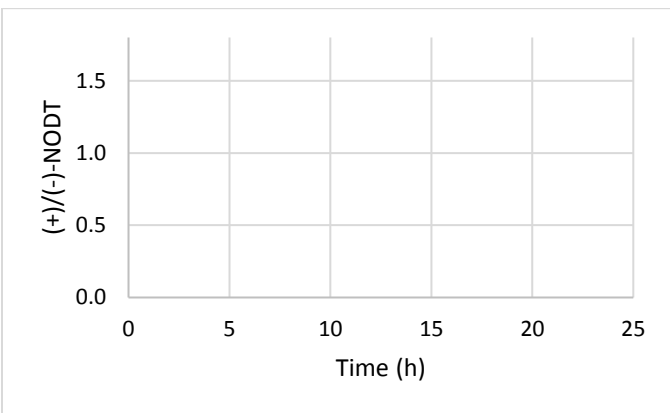

Supplement: PRP2-6-e00419-s001.pdf [file PRP2-6-e00419-s001.pdf]
